# Supplementary material for: Scn2a severe hypomorphic mutation decreases excitatory synaptic input and causes autism-associated behaviors
Source: PubMed Central journal article supplement (PMC8410058; doi:10.1172/jci.insight.150698), 2021-08-09

## **SUPPLEMENTAL FIGURES FOR:**

### ***Scn2a* loss-of-function mutation decreases excitatory synaptic input and causes autism-associated behaviors**

**Running title: *Scn2a* mouse model shows autism-associated behaviors**

Hong-Gang Wang<sup>1</sup>, Charlotte C. Bavley<sup>2,3</sup>, Anfei Li<sup>2</sup>, Rebecca M. Jones<sup>4,5,6</sup>, Jonathan Hackett<sup>3</sup>, Yared Bayleyen<sup>1</sup>, Francis S. Lee<sup>2,5,6</sup>, Anjali M. Rajadhyaksha<sup>2,3,5</sup>, Geoffrey S. Pitt<sup>1,5</sup>



**Supplementary Figure 2**

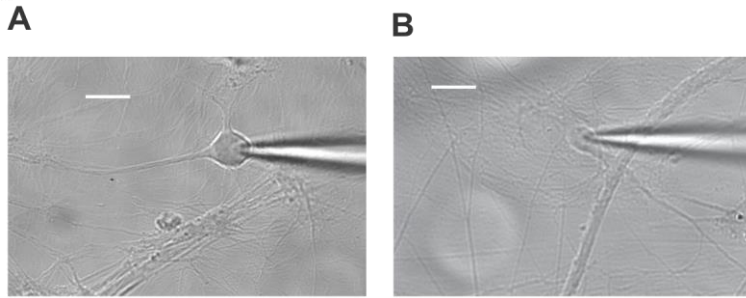

**Supp. Figure 2.** Pyramidal (*A*) and non-pyramidal (*B*) shape neurons in neuronal culture. Scale bar, 20  $\mu\text{m}$ .

### Supplementary Figure 3

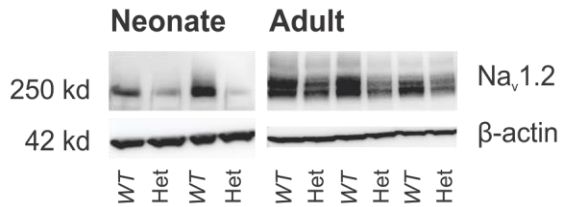

**Supp. Figure 3.** Cortices from *Scn2a*<sup>Δ1898/+</sup> mice have less Nav<sub>v</sub>1.2 voltage-gated Na<sup>+</sup> channels. Immunoblot for Nav1.2 Na<sup>+</sup> channel (anti-Nav1.2, recognizes an epitope in the I-II intracellular loop) in brain cortex lysates from P6 or adult (~5 month) *WT* or *Scn2a*<sup>Δ1898/+</sup> (*Het*) mice. Molecular weights are shown on the left. For both blots, β-actin serves as a loading control.

## Supplementary Figure 4

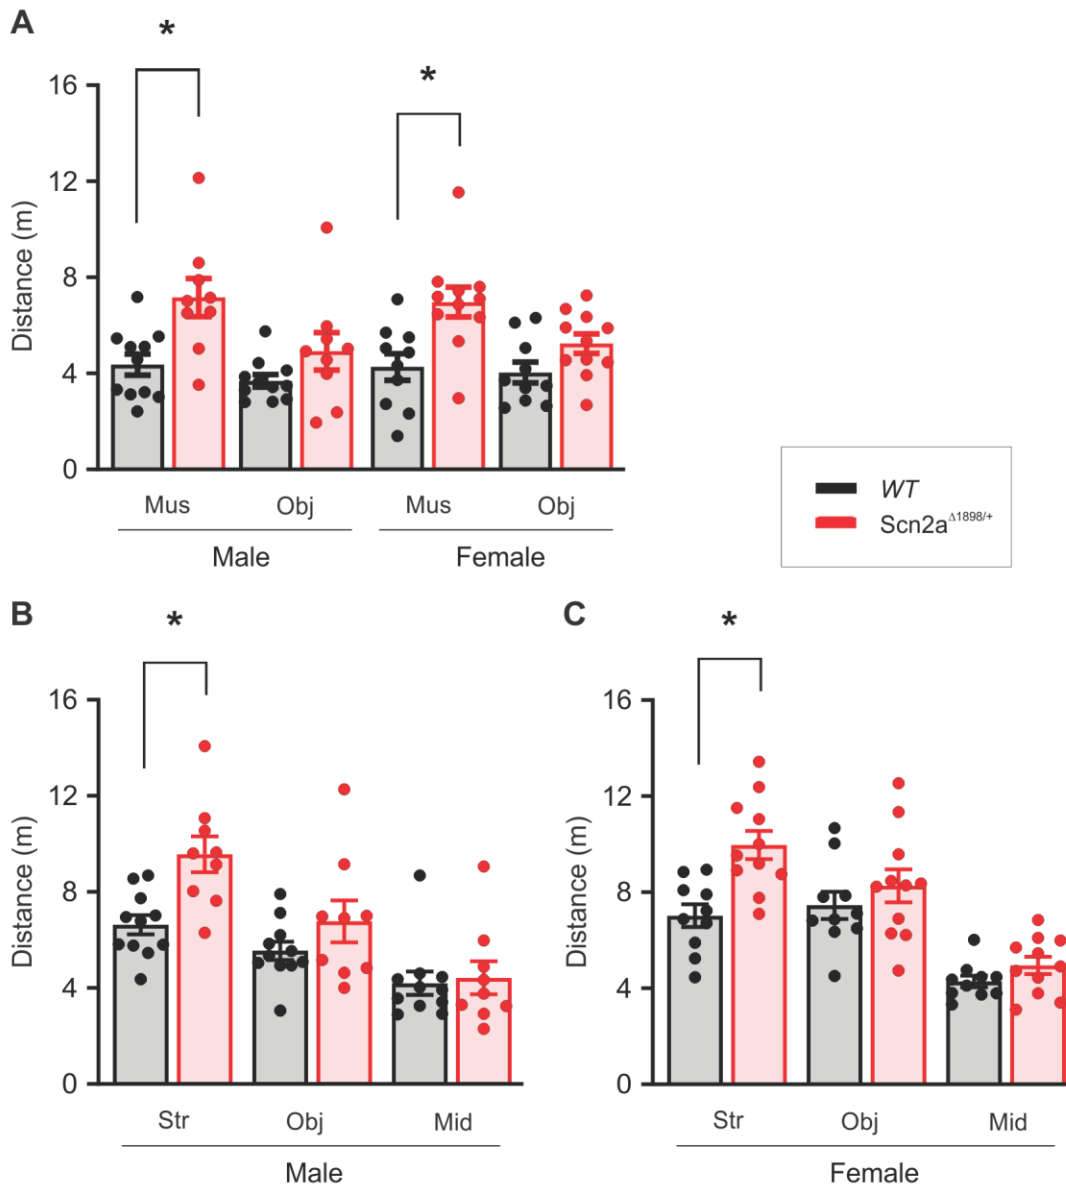

**Supp. Figure 4.** *Scn2a*<sup>Δ1898/+</sup> mice traveled more in the zone around novel mouse and chamber with novel mouse. **A**, Distance traveled in the zone around novel mouse (Mus) or object (Obj) (male: *WT*, n=11 and *Scn2a*<sup>Δ1898/+</sup>, n=9; female: *WT*, n=10 and *Scn2a*<sup>Δ1898/+</sup>, n=11). \*, unpaired *t* test,  $t(18)=3.214$ ,  $p=0.0048$  for male;  $t(19)=3.248$ ,  $p=0.0042$  for female. **B**, **C**, Distance traveled in the stranger (Str, with novel mouse), object (Obj, with object) and middle (Mid, between stranger and object) chambers. \*, unpaired *t* test,  $t(18)=3.618$ ,  $p=0.002$  for male;  $t(19)=3.861$ ,  $p=0.001$  for female.

**Supplementary Figure 5**

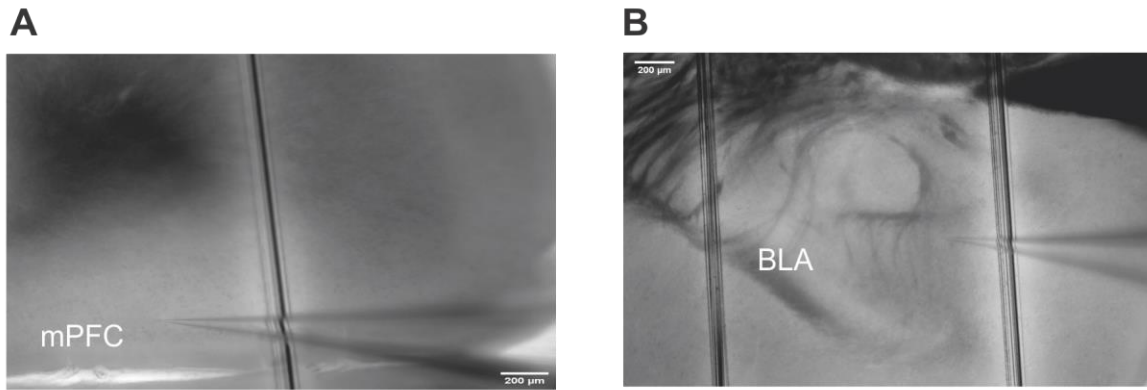

**Supp. Figure 5.** Micrographs showing brain slices with inclusion of mPFC (A) or BLA (B) from which sEPSCs and sIPSCs were recorded in pyramidal neurons. Scale bar, 200 µm.

**Fig. 1E**

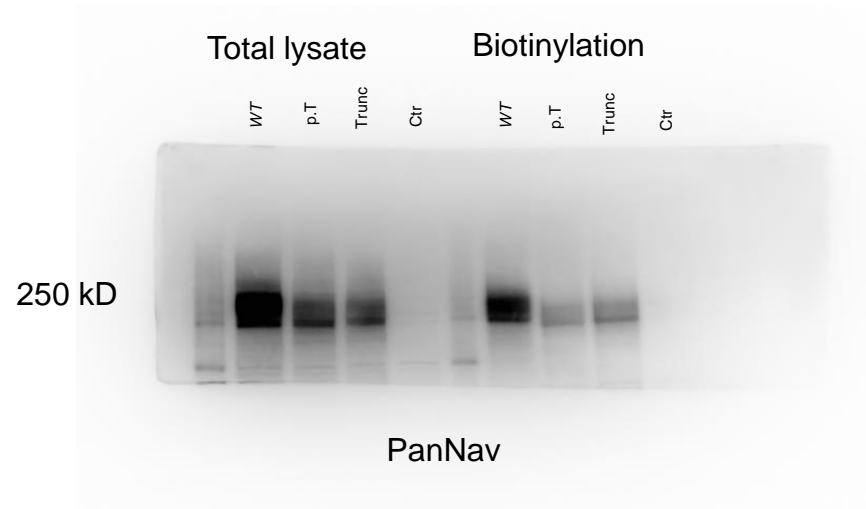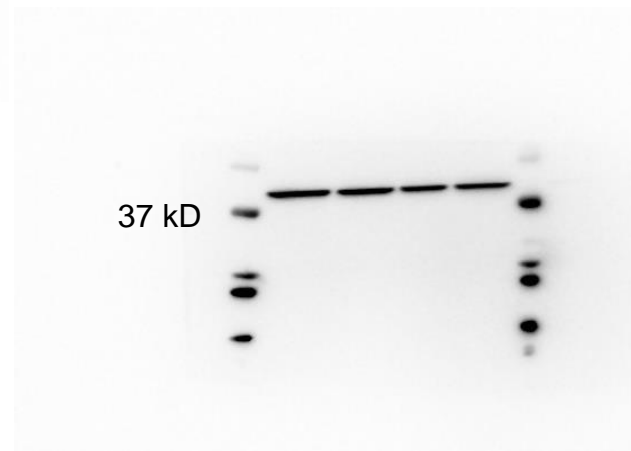

$\beta$ -actin

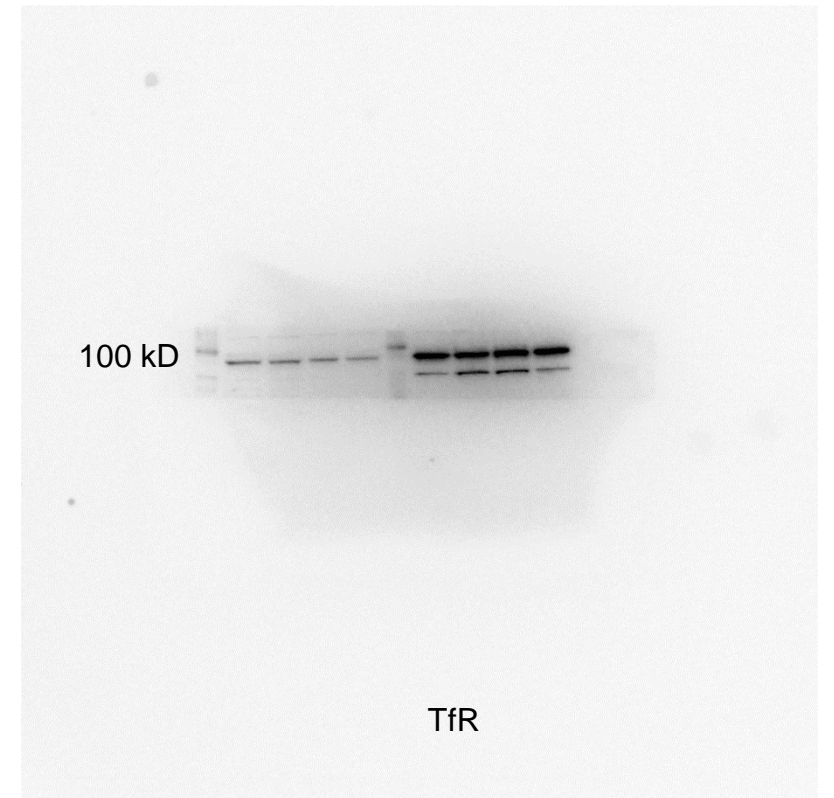

TfR

**Fig. 2A**

P6

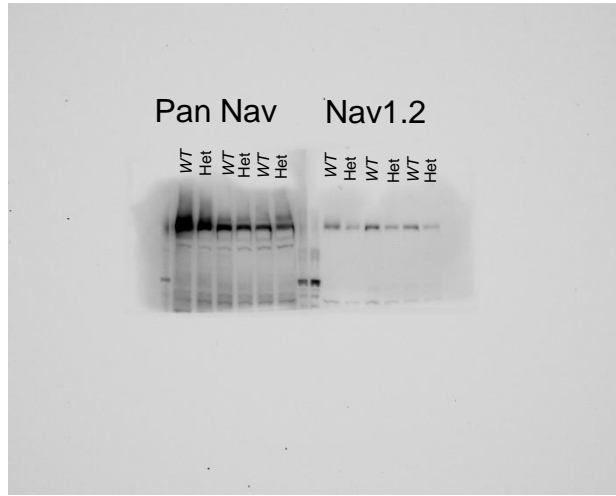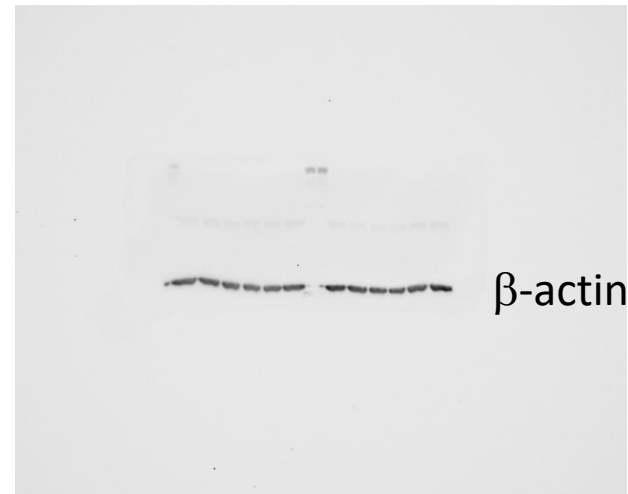

Adult

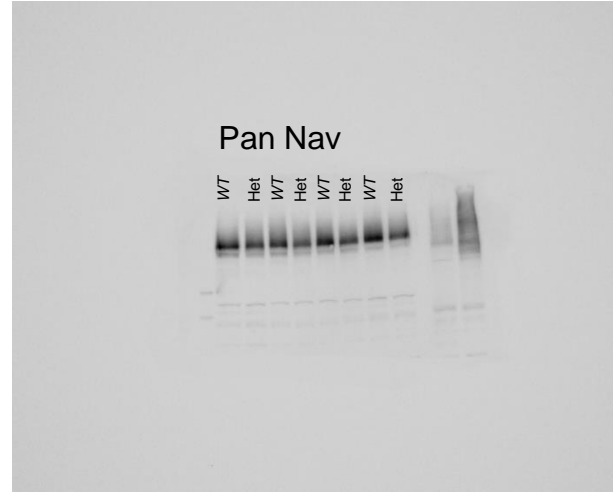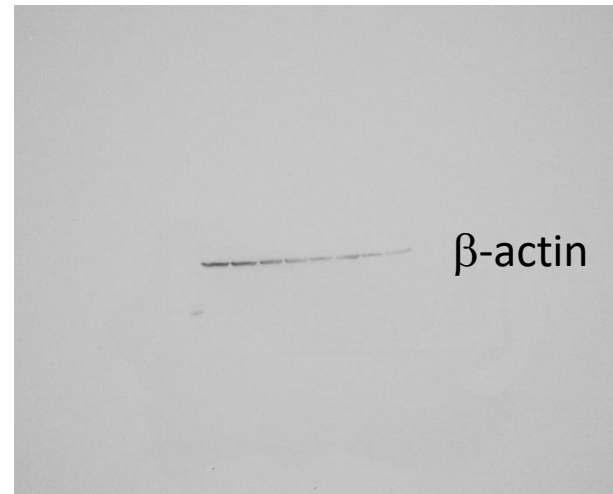

Adult

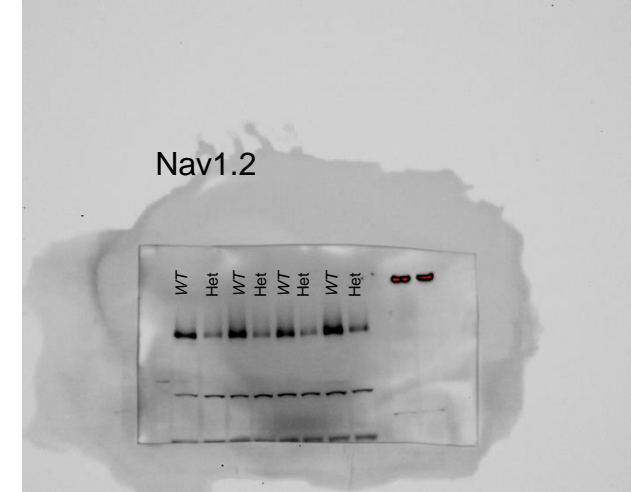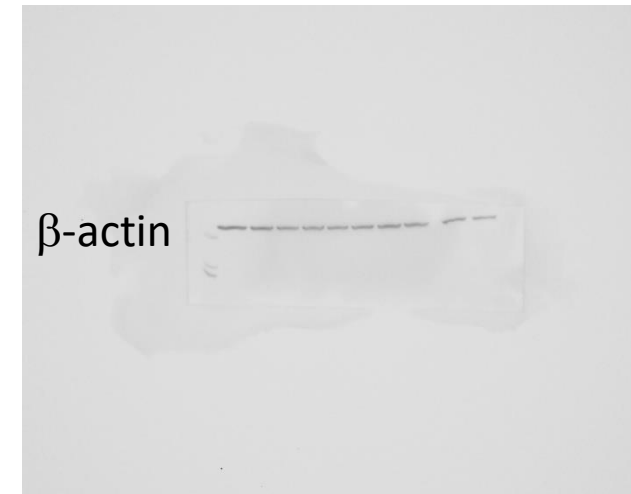



Supplemental Fig. 3

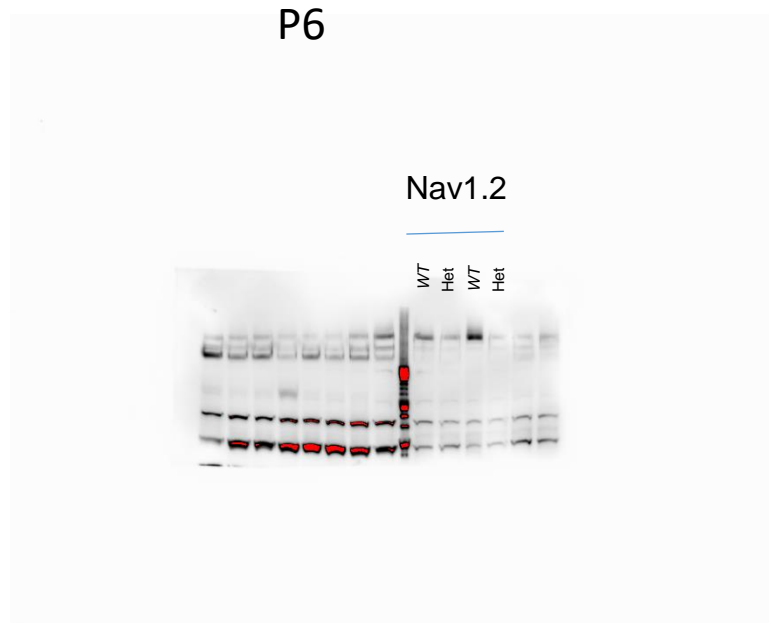

$\beta$ -actin

Detailed description: This Western blot shows beta-actin protein levels at P6. It shows a single, consistent band across all lanes, serving as a loading control.

Adult

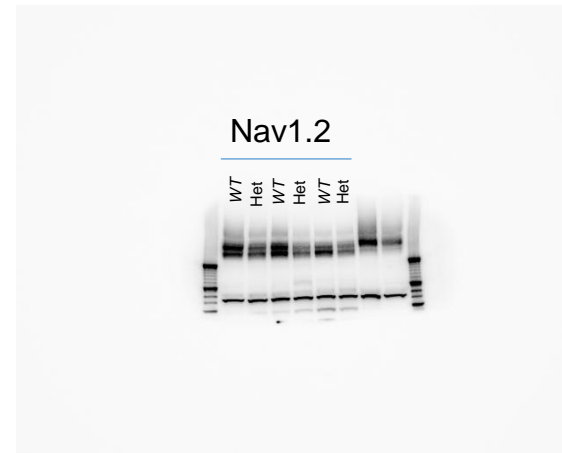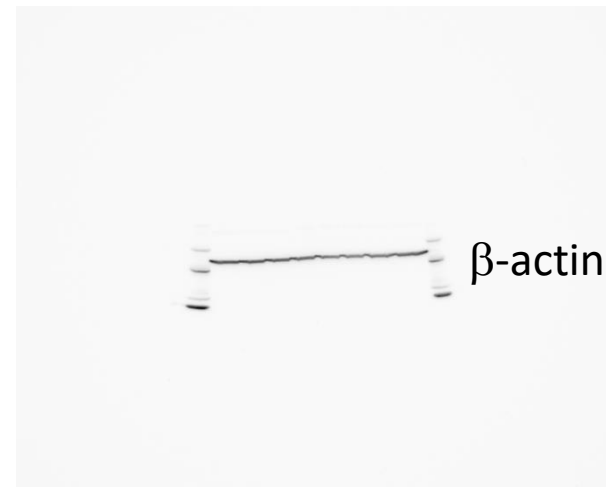

Supplement: jciinsight-6-150698-s124.pdf [file jciinsight-6-150698-s124.pdf]
