# Supplementary material for: Scn2a severe hypomorphic mutation decreases excitatory synaptic input and causes autism-associated behaviors
Source: JCI journal article supplement (doi:10.1172/jci.insight.150698), 2021-06-22
Supplement: sd1 [file 1]

You are being redirected.
